# Supplementary material for: δ 13 C carbon isotopic composition of CO 2 in the atmosphere by Lidar. A preliminary study with a CDIAL system at 2-µm
Source: Copernicus journal article supplement (doi:10.5194/egusphere-2025-1039), 2025-06-17
Supplement: Supplementary file [file egusphere-2025-1039-AC1-supplement.pdf]

## Response to the Review Report # 2 for the manuscript, titled “ $\delta^{13}\text{C}$ carbon isotopic composition of $\text{CO}_2$ in the atmosphere by Lidar. A preliminary study with a CDIAL system at $2\text{-}\mu\text{m}$ ”

The manuscript claims the capability of measuring atmospheric carbon dioxide's main isotopologues,  $^{12}\text{CO}_2$  and  $^{13}\text{CO}_2$ , simultaneously using a coherent differential absorption lidar operating at three wavelengths within the  $2\text{-}\mu\text{m}$  spectral region. While the objective of this work is to obtain the range-resolved  $\text{CO}_2$  isotopic ratio  $\delta^{13}\text{C}$  (Line 18), the conclusion clearly admits the limitation of obtaining such a ratio due to measurement precision and accuracy, as claimed (Lines 318-319). Therefore, the use of  $\delta^{13}\text{C}$  in the title is inappropriate.

From our measurements,  $\delta^{13}\text{C}$  has been indeed calculated in this manuscript as claimed in the title despite a large uncertainty. Section 6 of the manuscript gives also some guidelines to measure geophysical features of  $\delta^{13}\text{C}$  in the atmosphere with a lidar. We would like to keep  $\delta^{13}\text{C}$  in the title as this is the topic of our work.

In fact, careful spectroscopic analysis indicates major fundamental problems in this work, other than precision and accuracy, which implies that obtaining  $^{13}\text{CO}_2$  measurements is impossible, and thereafter  $\delta^{13}\text{C}$ , with the described setup operating at the stated spectral range. The presented results indicate measuring  $^{12}\text{CO}_2$  twice using two differential settings, rather than measuring  $^{13}\text{CO}_2$ , which leads to incorrect results interpretation by the authors. Therefore, this manuscript is rejected, and the authors should cautiously review the following issues.

**The analysis and the conclusion of the reviewer is based on a misunderstanding of HITRAN2020 database.** In HITRAN2020, the standard isotopic ratio 0.01118 is already included in isotopologue line intensity (<https://hitran.org/docs/definitions-and-units/>). Then Figure A of the reviewer proves that our spectral domain is fully relevant to measure  $^{12}\text{CO}_2$  and  $^{13}\text{CO}_2$  as claimed in the manuscript.

Please re-consider your review and conclusion with these facts.

**1- Insufficient Citation:** A significant part of this work was previously published in the 31st International Laser Radar Conference (ILRC), held in Landshut, Germany, 2024, by some of the authors, titled “ $\delta^{13}\text{C}$  carbon isotopic composition of  $\text{CO}_2$  in the atmosphere by Lidar”. This conference paper is uncited, while it includes the same methodology, spectral analysis and instrumental setup sections presented in this manuscript. In addition, papers presenting similar work by other research teams achieving atmospheric  $\text{CO}_2$  lidar measurements were uncited, indicating insufficient literature research.

Corrected. Citations related to  $\text{CO}_2$  absorption measurements by lidar have been added in the introduction as suggested by the reviewer :

“Several lidar teams have been interested in measuring  $\text{CO}_2$  absorption with DIAL systems since almost twenty years with precursor work using DIAL systems in the  $2\text{ }\mu\text{m}$  spectral band and coherent detection (Koch et al. 2004, Gibert et al. 2006) and more recent works (Gibert et al. 2015). The spectral band of  $1.6\text{ }\mu\text{m}$  has also been considered with coherent DIAL (Yu et al. 2024) or direct detection DIAL, using the advantage of low noise internally amplified photodetector (Shibata et al. 2017; Yue et al. 2022; Stroud et al. 2023) although the obtained precision was limited by the ten times lower  $\text{CO}_2$  absorption optical depth at such wavelength. “

**2- Incorrect Spectral Analysis:** Figure 1 presents the absorption cross-section spectra for  $^{12}\text{CO}_2$ ,  $^{13}\text{CO}_2$  and  $\text{H}_2\text{O}$ , with unclear scaling parameters. It is unclear how the curve marked “Total” was obtained. The  $^{13}\text{CO}_2$  spectral profile is not multiplied by the VPDB isotopic ratio of 0.01118, as stated in the figure caption. Proper spectral analysis is required to justify the lidar measurement presented later. Therefore, the spectral analysis of Figure 1 was reproduced to fully understand the problem.

We agree that Figure 1 and associated caption is unclear and could lead to a somewhat misunderstanding. To clarify the picture, we remove the total ACS curve and we modify the caption :

« Absorption cross-section (ACS) for  $^{12}\text{CO}_2$ ,  $^{13}\text{CO}_2$  and  $\text{H}_2\text{O}$  for pressure 984 hPa and temperature  $24^\circ\text{C}$  (Voigt profile). Isotopic ratio is taken into account. The DIAL wavelengths chosen in this work are indicated. »

New Figure 1 is below:

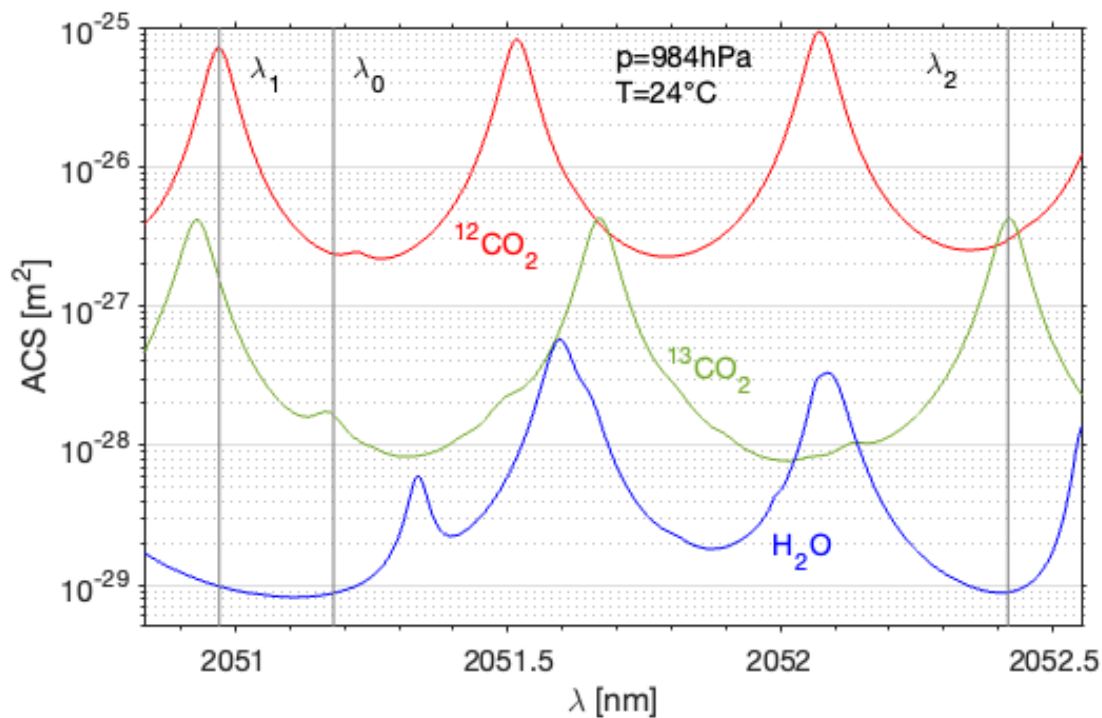

First, Figure A presents the absorption cross-section spectra for  $^{12}\text{CO}_2$ ,  $^{13}\text{CO}_2$  and  $\text{H}_2\text{O}$  without any scaling factors. The profiles in Figure A were obtained from HITRAN 2020 database using Voigt line model and closely match the profiles presented in Figure 1 except for  $\text{H}_2\text{O}$  magnitude.

Figure A corresponds to former Figure 1 except for  $\text{H}_2\text{O}$  where ACS has been multiplied by a factor 25 assuming mean  $\text{H}_2\text{O}$  mixing ratio is 1% and  $\text{CO}_2$  mixing ratio is 0.04%. To clarify Figure 1, standard ACS from the database (without factor 25 due to relative  $\text{CO}_2/\text{H}_2\text{O}$  abundance in the atmosphere) has been displayed.

Second, Figure B presents the same profiles of Figure A but with amplitude scaling using the same factors claimed in the caption of Figure 1, which include 25 for  $\text{H}_2\text{O}$  and 0.01118 for  $^{13}\text{CO}_2$ . Figure B clearly indicates that the 0.01118 factor was not included in the  $^{13}\text{CO}_2$  profile of Figure 1 in the submitted manuscript (nor the ILRC paper), whereas the  $\text{H}_2\text{O}$  scaling factor of 25 was included. This leads to the wrong conclusion of the ability to measure  $^{13}\text{CO}_2$  using on-line (ON13) wavelength shown in Figure 1.

Figure B is a nonsense. Isotopic ratio is already included in HITRAN ACS (<https://hitran.org/docs/definitions-and-units/>).

Third, following proper analysis, figure C presents the absorption coefficient spectra for the same molecules, after including the number density and atmospheric abundance of each molecule, as well as the total absorption. From Figure C, it is evident that the total absorption is dominated by  $^{12}\text{CO}_2$  with some influence from  $\text{H}_2\text{O}$  but without any key contribution from  $^{13}\text{CO}_2$ . The  $^{13}\text{CO}_2$  absorption coefficient is about 3 orders of magnitude lower than  $^{12}\text{CO}_2$  and therefore does not contribute to the total absorption. This is due to lower  $^{13}\text{CO}_2$  absorption strength within this 2- $\mu\text{m}$  region, as presented in Table 1, and lower  $^{13}\text{CO}_2$  abundance of 0.01118, as presented in the caption of Figure 1.

This indicates that  $^{13}\text{CO}_2$  is unmeasurable at all using the claimed settings, while  $^{12}\text{CO}_2$  is measured twice, using two on-line and single off-line wavelengths.

Figure C is also a nonsense. When isotope ratio is included in the line intensity, the absorption of the isotopologue (i.e. here  $^{13}\text{CO}_2$ ) is calculated with the abundance of the main isotopologue (i.e. here  $^{12}\text{CO}_2 \sim 400$  ppm) and not with the abundance of  $^{13}\text{CO}_2 \sim 4$  ppm. The analysis/conclusion of the reviewer is obviously wrong when you know that isotopic ratio is included in HITRAN ACS.

#### **Improper Interpretation for the Lidar Measurements:**

The lidar results presented in Figures 8(c) and (d) show a high correlation between C12 and C13 measurements, which is unrealistic.

Both in situ and lidar measurements are displayed in Figure 8. The reviewer comment concerns  $^{12}\text{CO}_2$  and  $^{13}\text{CO}_2$  measurements provided by the in situ PICARRO gas analyzer which is a reference sensor for such measurements. I don't understand what « unrealistic » means here.

Generally,  $^{13}\text{CO}_2$  abundance is either uncorrelated or anticorrelated to  $^{12}\text{CO}_2$ , due to the Suess effect. High correlation between C12 and C13 measurements confirms measuring  $^{12}\text{CO}_2$  twice using two different spectral settings.

No, this is definitively wrong as shown by the in situ PICARRO measurements in Figure 8 and Figure 9a. Despite a strong correlation in PICARRO C12 and C13 measurements, there is still some information in  $\delta^{13}\text{C}$  represented in the Keeling plot. These  $\delta^{13}\text{C}$  measurement have to be extrapolated to the origin ( $1/\text{CO}_2 \rightarrow 0$ ) to get some information of sources and sinks. Please see Widory, D. and Javoy, M.: The carbon isotope composition of atmospheric  $\text{CO}_2$  in Paris, Earth and Planetary Science Letters, 215, 289-298, doi: 10.1016/S0012-821X(03)00397-2, 2003

C12 in Figure 8(c) represents  $^{12}\text{CO}_2$  measurement with high sensitivity, due to high differential absorption coefficient between ON12 and OFF, of Figure C. C13 in Figure 8(d) again represents  $^{12}\text{CO}_2$  measurement with lower sensitivity, due to lower differential absorption coefficient between ON13 and OFF, of Figure C, but not  $^{13}\text{CO}_2$  as claimed. That explains the failure to obtain the  $\delta^{13}\text{C}$  ratio by applying Equation 4 to the results of Figure 8 for the same molecule.

Wrong remark due to wrong understanding of HITRAN database.

#### **Incorrect Dry Air Terms in Equations:**

In Equations 2 and 3 the term for dry air is given by  $(1 - \text{CH}_2\text{O})n_{\text{air}}$ , which is wrong. The correct term for dry air is  $n_{\text{air}} / (1 + \text{CH}_2\text{O})$ .

Correct. It was a typo that has been corrected in the preprint version of the paper. In the calculations we used for the dry air:  $n_{air} / (1 + C_{H_2O})$ .  $C_{H_2O}$  and  $C_{12}$  being dry air mixing ratio. Equations 2 and 3 have already been corrected in the preprint version.
